# Supplementary material for: Uptake of heavy metal ions from aqueous media by hydrogels and their conversion to nanoparticles for generation of a catalyst system: two-fold application study
Source: Royal Society of Chemistry journal article supplement (doi:10.1039/c8ra00578h), 2018-01-01
Supplement: c8ra00578h1.pdf [file c8ra00578h1.pdf]

**Uptake of heavy metal ions from aqueous medium by hydrogels and its conversion to nanoparticles for generation of catalyst system: Two fold application study**

Rida Javed, Luqman Ali Shah\*, Murtaza Sayed, Muhammad Saleem Khan

*National Centre of Excellence in Physical Chemistry, University of Peshawar, Peshawar*

*25120 Pakistan*

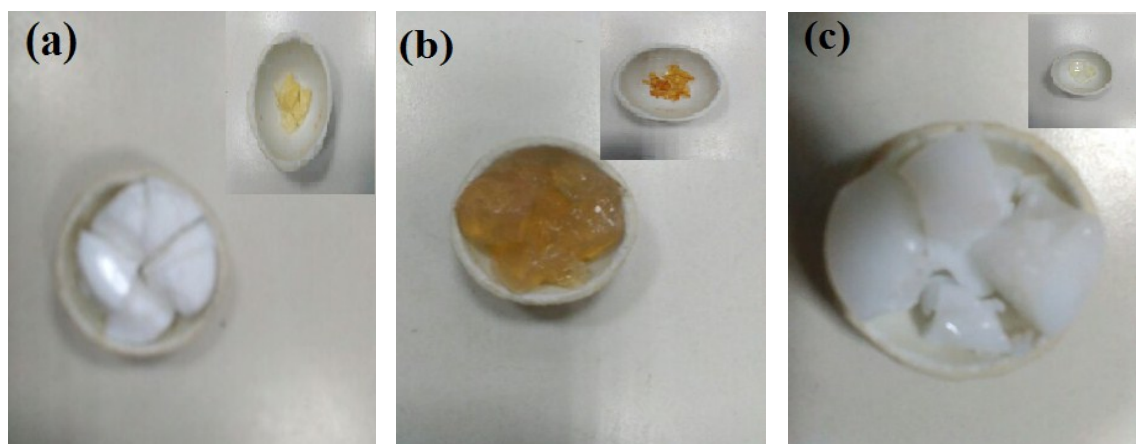

**Fig. S1** Physical appearance of synthesized wet (a) P(MAA) (b) P(APTMACl) and (c) P(AAm) and dried (insets) hydrogels

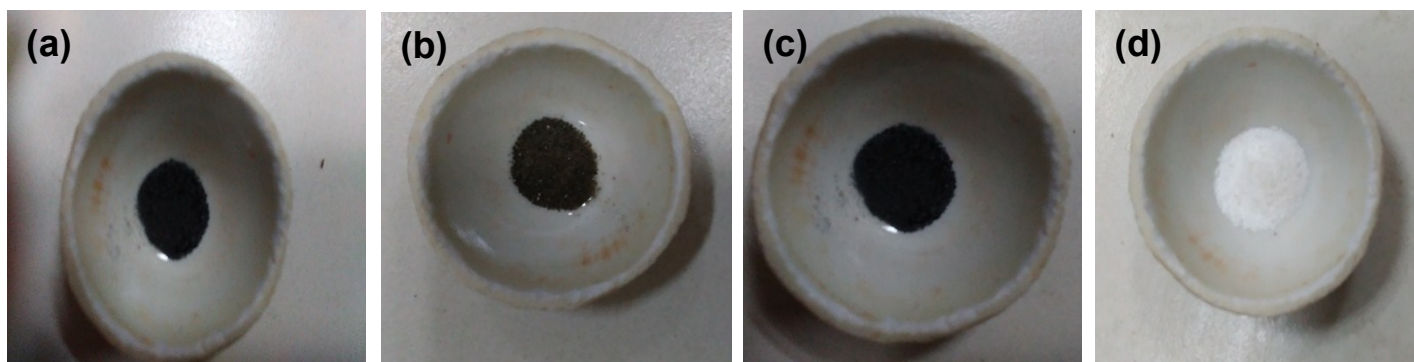

**Fig. S2** Physical appearance of prepared (a) P(MAA)-Cu (b) P(MAA)-Co (c) P(MAA)-Ni and (d) P(MAA)-Zn hybrid hydrogels

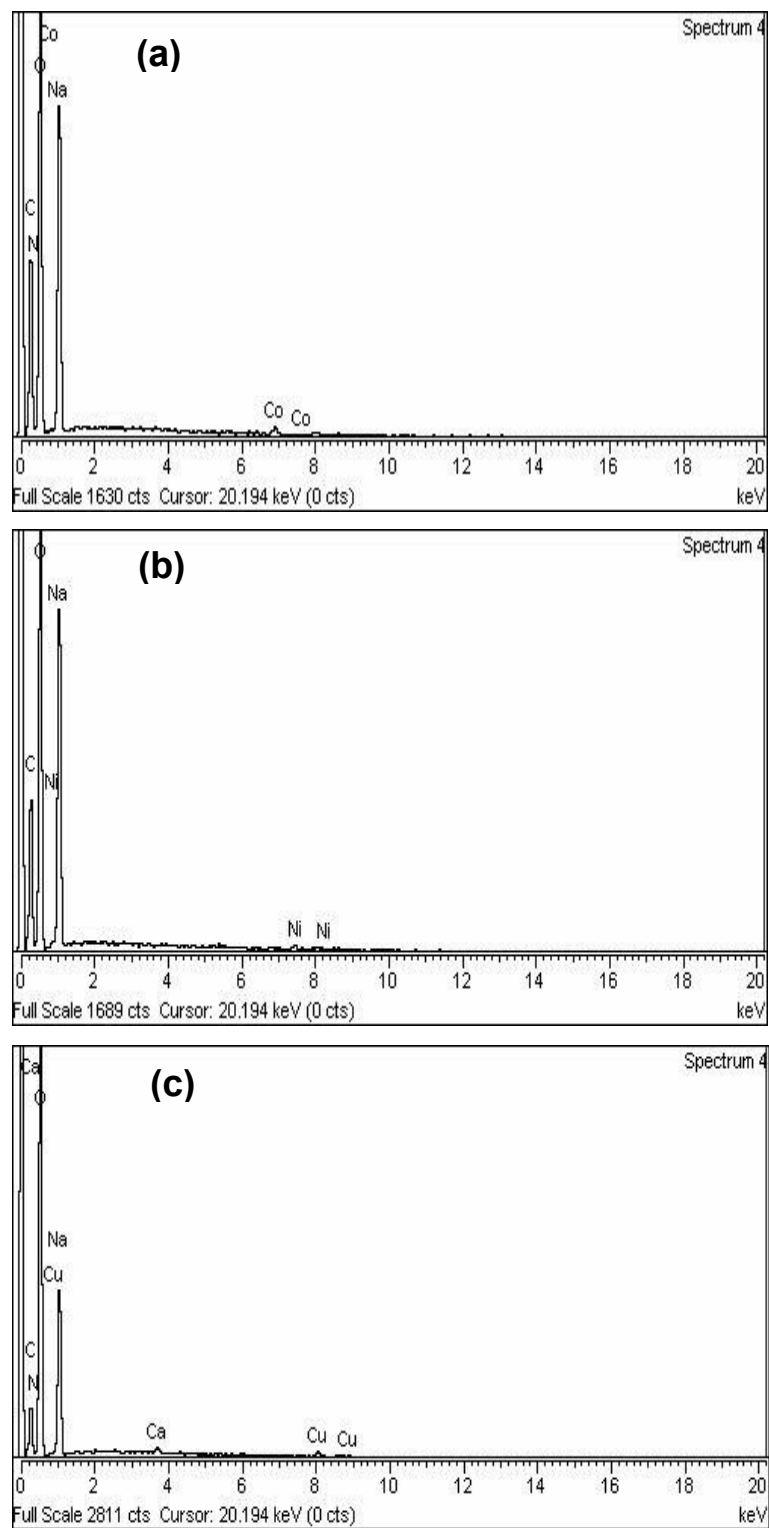

**Fig. S3** EDX spectral analysis for (a) P(MAA)-Co (b) P(MAA)-Ni and (c) P(MAA)-Cu

**Table S1** Temperature, wt. loss and amount of metals for pure and hybrid P(MAA) hydrogels

| <b>Sample</b> | <b>1<sup>st</sup>(degradation)</b> |                     | <b>2<sup>nd</sup>(degradation)</b> |                     | <b>3<sup>rd</sup>(degradation)</b> |                     | <b>Metal content (%)</b> |
|---------------|------------------------------------|---------------------|------------------------------------|---------------------|------------------------------------|---------------------|--------------------------|
|               | <b>Temp (°C)</b>                   | <b>wt. loss (%)</b> | <b>Temp (°C)</b>                   | <b>wt. loss (%)</b> | <b>Temp (°C)</b>                   | <b>wt. loss (%)</b> |                          |
| P(MAA)        | 58-327                             | 33%                 | 343-449                            | 60%                 | No                                 | No                  | 0                        |
| P(MAA)-Cu     | 42-134                             | 26%                 | 406-520                            | 28%                 | =                                  | =                   | 26                       |
| P(MAA)-Co     | 34-155                             | 26%                 | 407-501                            | 21%                 | 659-750                            | 8%                  | 25                       |
| P(MAA)-Ni     | 35-133                             | 24%                 | 400-488                            | 21%                 | 643-749                            | 9%                  | 25                       |
| P(MAA)-Zn     | 39-114                             | 22%                 | 405-510                            | 26%                 | 640-750                            | 8%                  | 26                       |

**Table S2** Temperature, wt. loss and metal content for P(APTMACl) and P(AAm) hydrogels

| Sample        | 1 <sup>st</sup> degradation |              | 2 <sup>nd</sup> degradation |              | Metal content (%) |
|---------------|-----------------------------|--------------|-----------------------------|--------------|-------------------|
|               | Temp (°C)                   | wt. loss (%) | Temp (°C)                   | wt. loss (%) |                   |
| P(APTMACl)    | 50-224                      | 21           | 230-460                     | 61           | 0                 |
| P(APTMACl)-Cu | 45-120                      | 16           | 153-460                     | 45           | 21                |
| P(APTMACl)-Co | 123-300                     | 39           | 326-460                     | 24           | 19                |
| P(APTMACl)-Ni | 72-240                      | 37           | 243-460                     | 26           | 19                |
| P(APTMACl)-Zn | 50-207                      | 23           | 213-460                     | 36           | 24                |
| P(AAm)        | 70-316                      | 34           | 336-460                     | 35           | 0                 |
| P(AAm)-Cu     | 90-303                      | 22           | 323-460                     | 32           | 15                |
| P(AAm)-Co     | 70-330                      | 31           | 338-460                     | 18           | 20                |
| P(AAm)-Ni     | 72-240                      | 15           | 243-460                     | 37           | 17                |
| P(AAm)-Zn     | 160-219                     | 43           | 228-460                     | 19           | 3                 |

**Table S3** % R capability of hydrogels towards different concentration of metal ions solution

| Concentrations | P(MAA)<br>%R |    |     |    | P(AAm)<br>% R |    |    |    | P(APTMACl)<br>% R |    |    |    |
|----------------|--------------|----|-----|----|---------------|----|----|----|-------------------|----|----|----|
|                | Cu           | Co | Ni  | Zn | Cu            | Co | Ni | Zn | Cu                | Co | Ni | Zn |
| 5 ppm          | 99           | 94 | 98  | 70 | 54            | 67 | 77 | 49 | 62                | 68 | 85 | 45 |
| 10 ppm         | 100          | 96 | 97  | 87 | 58            | 68 | 76 | 49 | 63                | 71 | 81 | 53 |
| 20 ppm         | 98           | 94 | 86  | 97 | 68            | 78 | 88 | 38 | 49                | 64 | 86 | 29 |
| 40 ppm         | 100          | 99 | 100 | 97 | 43            | 71 | 94 | 36 | 33                | 66 | 76 | 28 |

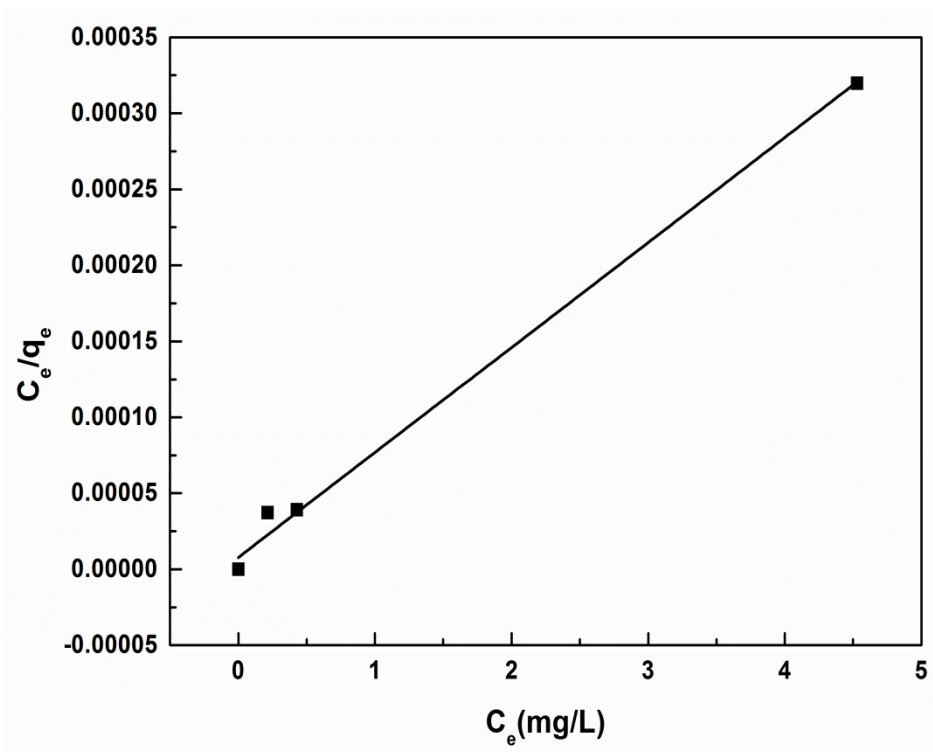

**Fig. S4** Langmuir isotherm for absorption of Cu by P(MAA) from aqueous medium
